# Supplementary material
Source: publisher figshare collection journal article supplement (https://tandf.figshare.com/ndownloader/files/18526328)
Supplement: Supplementary file 1 [file 18526328]

Appendix

1*. D. acanthogene* Rusby – * *R. Couto, s/n* (cultivo).

2. *D. chondrocarpa* Griseb*.* – Brazil. Rio de Janeiro: Paraty. Caminho para o “Córrego dos Micos”. 25-I-2011, * *R. Couto et al. 474* (RFA 37188). Pará: Oriximiná, Ramal do “Poção”, em direção e estrada do “Beque”. *R. Couto et al. 462* (RFA 37296). Rio de Janeiro: Rio de Janeiro, Jardim Botânico. Cultivada no canteiro 17D, 16-II-1976, *J.P Fontela, 516*, *E.F. Guimarães 403 et C.L.F. Ichaso* (RB 301049).

3. *D. anomala* (Kunth) Griseb. - Brazil. Minas Gerais: Santana do Riacho. Serra do Cipó, Conceição do Mato Dentro. Fazenda Cachoeira da Capivara. 19º 14’ 59,9” S 43º 32’ 44,2” W 1300 msm. 13-X-2007. * *V.C. Souza, P.H. Miyagi,* *J. P. Souza 8224* (ESA19284). Goiás: Alto Paraíso de Goiás Mulungu ca. 14 Km de Alto Paraíso. 14-XI-1996, *M. L. Fonseca, 1340* (RB 442112). Minas Gerais: Santana do Riacho, Km 132 ao longo da rodovia. 30-X-1981, *M. G. Sajo 7611* (RB409800).

4. *D. campestris* Griseb. **–** Brazil.Rio de Janeiro: São Fidelis, Estrada para Ayres sentido Santa Maria Madalena, para Aracaju, barra do rio Colégio, fazenda do Advogado Helinho. S 022 27 87 W 76 02 803 3. 28-VIII-2009, * *R. S. Couto, J.M.A Braga, L. J. T. Cardoso 232* (RFA 37046). Ceará: Jaguaretama. 03-V-1984, *Pinheiro 153* (R209588). Minas Gerais: Lima Duarte, Parque Estadual do Ibitipoca, ao lado da guarita de entrada, seguindo o aceiro. 23-I-2007, ***R.C.*** ***Forzza 4384* (**RB 442006).

5. *D. campos-portoi* R. Knuth - Brazil. Rio de Janeiro: Itatiaia, PARNA, Planalto, trilha para as prateleiras. Platô de pedra na trilha. 20/X/09, * *R. Couto, 265* (RFA). Rio de Janeiro: PNI, entrada da trilha para a cachoeira véu de noiva, junto à ponte. 20-VII-10, *R. Couto, 380* (RFA 37203).

6. *D. convolvulacea* Schltdl. & Cham. – Trinidad. * *Chase 197* (NCU). 16-VIII-2001. *C.G. Báez 7220.*

7. *D. coronata* Hauman – Brazil. Rio de Janeiro: Maricá, Itaipuaçu. 17-XI-2009, * *R. Couto 293* (RFA). Rio de Janeiro: Rio de Janeiro, pista Cláudio Coutinho (Morro da Urca) próximo aos 800m. 16-VIII-2009, *R. Couto 208* (RFA).

8. *D. demourae* R. Knuth – Brazil. Espírito Santo: Pedra Menina, Parque Nacional do Caparaó. 06-III-2013, * *R. Couto, s/n* (RFA). Rio de Janeiro: PNSO, trilha para a Pedra do Sino, próximo ao Abrigo 2. 31-III-2010, *R. Couto 312* (RFA).

9. *D. glandulosa* (Griseb.) Knuth – Brazil. Estado do Rio de Janeiro: Parque Nacional da Tijuca, Trilha para o “Pico do Papagaio”. 22-X-2009, * *R. Couto et al. 283* (RFA). Brasília: Distrito Federal. DF 150, KM 11. Rua do Mato, Fazenda Morada do Sol. 14-VII-2007, *R. Couto, J.M.A. Braga 98*a(RFA)*.* Estado do Rio de Janeiro: Parque Nacional da Tijuca, trilha para o “Pico do Papagaio”. *R. Couto et al. 468* (RFA 37225).

10. *D. grandiflora* Klotzsch ex Kunth– Brazil.Minas Gerais: Belo Horizonte, 01-04-1898, * *A. Silveira s.n.* (R122772). Caracaraí, Km 10. 17-03-1967, *E. Forero s.n.* (R118415). Ouro Preto. Estação de Santa Rita, 01-XII-1896, *A.Silveira s.n.* (R181576).

11. *D. grisebachii* Kunth - Brazil, Rio de Janeiro: Município do Rio de Janeiro, Estrada das Paineiras. 02-XI-2008, * *R. Couto et al. 112* (RFA 37135). Rio de Janeiro. Parque Nacional da Tijuca, Trilha para o Pico do Papagaio. *M. Almeida 117; J. Lucas s.n.* (R223949). Rio de Janeiro: Município de Itatiaia, Travessia Ruy Braga. S22° 24’ 05.0’’ W044° 39’ 11.8’’ 2244m altura. 08-IV-2016, *R.M.B. Souza-Souza et al. 393* (R).

12. *D. mollis* Kunth - Brazil. Estado do Rio de Janeiro: Vilatur – Restinga da Massambaba, área aberta. S22’ 55’ 614 W 42’ 26’ 125 - Município de Niterói. Beira da estrada, estrada da trilha, próximo ao mirante da estrada Niterói, Itaipuaçu. S22’ 57, 779’ W 43’ 01 288. 14/VIII/2008, * R.S. Couto*, R.C. Lopes, R.S. Candido 121* (RFA).

13. *D. monadelpha* (Kunth) Griseb. – Brazil. Rio de Janeiro: Paraty, Trindade, Praia do Meio (Ranchos). * *R. Couto et al. 488* (RFA 37189). Rio de Janeiro: Angra dos Reis, Praia Secreta. 28-XI-2008, *R. Couto, 145, R.C. Lopes, R. S. Candido* (RFA 37246). Rio de Janeiro: Angra dos Reis, Ilha Grande. Trilha para dois rios, beira da estrada, meio da trilha. 14-VIII-2010, *R. Couto et al. 406* (RFA 37414).

14. *D. multiflora* Mart. ex Griseb. – Brazil. Rio de Janeiro: Niterói, Parque Estadual da Serra da Tiririca, Trilha para o Morro das Andorinhas. 08-VI-2011, *R. Couto et al. 495* (RFA 37235). Rio de Janeiro: S. José Vale do Rio Preto. Sítio Beira Mar – Poço Fundo 22º10’44” S 42º 53’ 18” W, 488m. 05-XI-2000, *F. M. B. Pereira, 13* (RFA 25745). São Paulo: Salmourão. Cerca de 5 Km de Salmourão em direção a Caramuru 21°35’12” S, 50°52’05” W 360m. *V.C. Souza e J.P. Souza 11422* (ESA).

15. *D. ovata* Vell. - Brazil. Rio de Janeiro: Estrada as Paineiras, após a bifurcação com o Sumaré. 23-X-2009, * *R. Couto et al. 290* (RFA 37141). Rio de Janeiro: Estrada das Paineiras, logo após a bifurcação para a estrada do Sumaré, em direção do Hotel. 26-IX-2009, *R. Couto et al. 249* (RFA 37002). Rio de Janeiro: Paineiras, próximo ao Mirante. 29-11-2009, *R. Couto et al. 295b* (RFA 37057).

16. *D. planistipulosa* Uline ex R. Knuth – Brazil. Rio de Janeiro: Petrópolis, Estrada Paty do Alferes, 870m. 01-XI-1970, * *D. Sucre, 7333* (RB145907). Rio de Janeiro, Simaré, Estrada Alto da Boa Vista, 450-570m. 29-X-1970, *D. Sucre 7327* (RB 145906). Pará: Canaã dos Carajás, Serra Sul, 6°22’18”S, 50°23’05”W, 750m. 8-XII-2007, *P. L. Viana et al. 3413* (RB 497329).

17. *D. sincorensis* R. Knuth – Brazil. Bahia: Lençóis, Parque Nacional da Chapada Diamantina, Trilha para a Cachoeira do Sossego, 500 m. após a bifurcação para o Ribeirão do meio. 17-1-2012, * *R. Couto 605* (R227186). Rio de Janeiro. *R. Couto s.n.* (cultivo).

18. *D. stegelmanniana* R. Knuth - Brazil. Rio de Janeiro: Nova Friburgo, Lumiar, próximo à entrada do Encontro das Águas. 01-V-2010, * *R. Couto et al. 325* (RFA 37151). Rio de Janeiro: Magé. Distrito de Santo Aleixo. 01-IV-2010, *R. Couto, M. Nadruz, L.A. Santos Filho, M.J.F. Barros, P. Godinho 321* (RFA 37156). Espírito Santo: Nova Venécia, Serra de Baixo. Área de Proteção Ambiental da Pedra do Elefante. 14-IV-2009, ***C.N. Fraga 2519* (**RB 479980).

19. *D. subhastata* Vell. - Brazil. Rio de Janeiro: Itatiaia, PARNA, parte baixa, KM 6 logo após a venda de chocolates, beira da estrada. Borda da Mata (0540700 S 7517039 W 756 ms.m). 19-X-2009, * *R. Couto et al. 263* (RFA 37147). Rio de Janeiro: Porciúncula, Pedra da Elefantina. 27-VIII-2009, *R. Couto, 221; J.M. A. Braga; L.J.T. Cardoso* *s.n.*(RFA 37143).
